# Supplementary material
Source: MDPI journal article supplement (https://www.mdpi.com/2072-4292/11/18/2148)

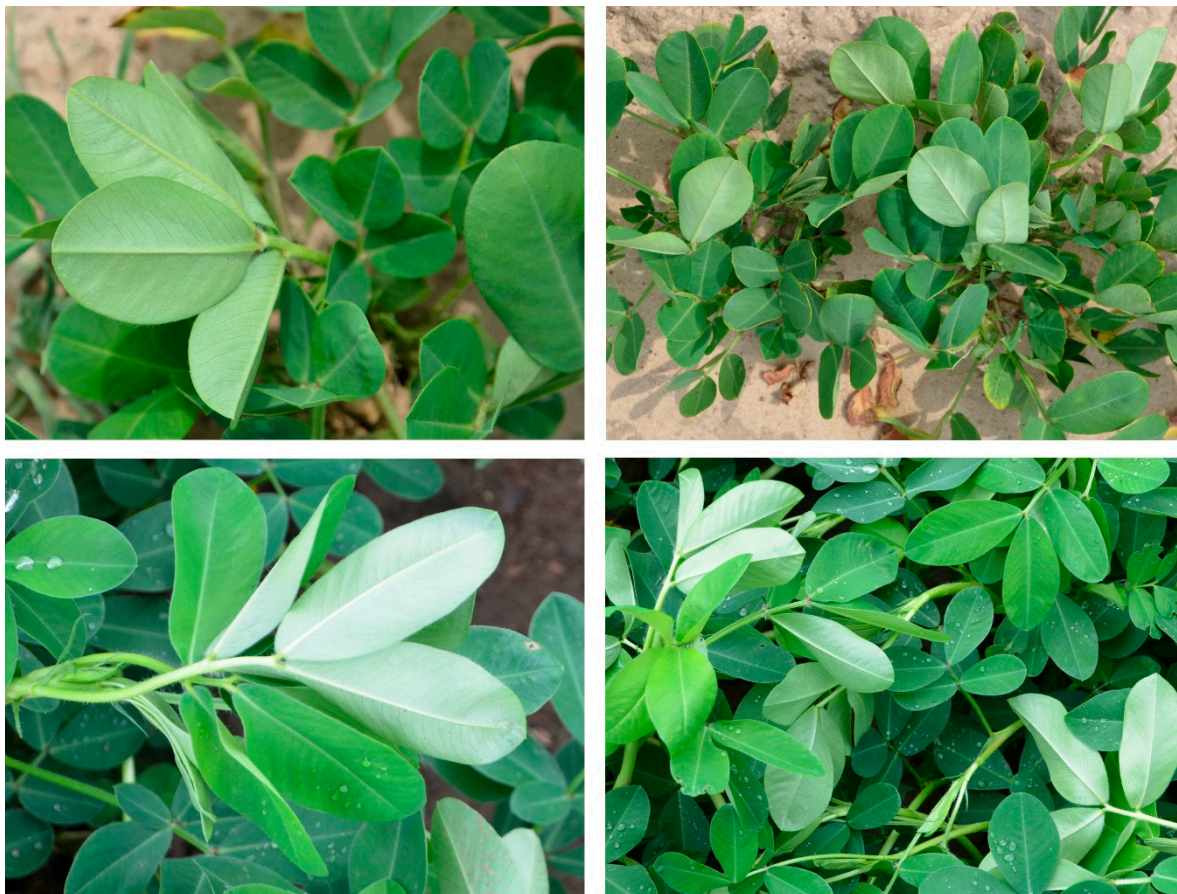

**Figure S1.** Photographs of peanut canopies in the field.

Supplement: s1 [file s1]
